# Supplementary material for: Assembling and dissembling zinc-containing coordination polymers of 4′-phenyl-4,2′:6′,4″-terpyridine
Source: Royal Society of Chemistry journal article supplement (doi:10.1039/b926598h), 2010-01-01
Supplement: b926598h.pdf [file b926598h.pdf]

## Electronic Supporting Information

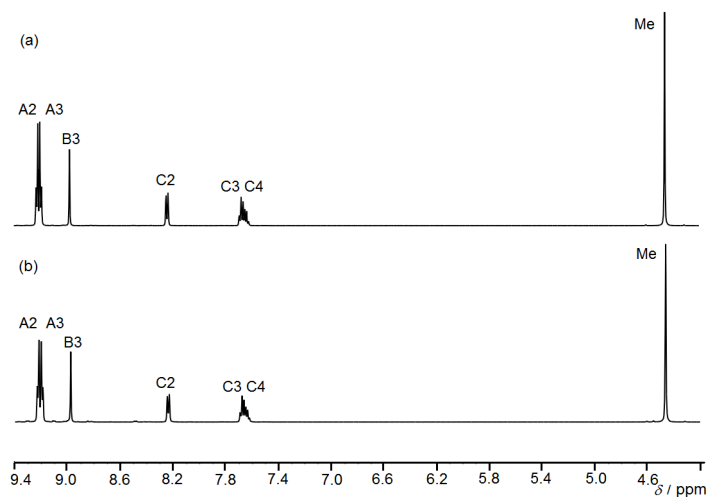

Fig. S1 500 MHz <sup>1</sup>H NMR spectra of DMSO-*d*<sub>6</sub> solutions of (a) [(**3**)Me<sub>2</sub>][ZnI<sub>4</sub>] and (b) [(**3**)Me<sub>2</sub>]I<sub>2</sub>. The ring labelling is given in Scheme 1 of the main paper.
